# Supplementary material
Source: publisher figshare collection journal article supplement (https://sage.figshare.com/ndownloader/files/15073466)
Supplement: Supplementary file 1 [file 15073466]

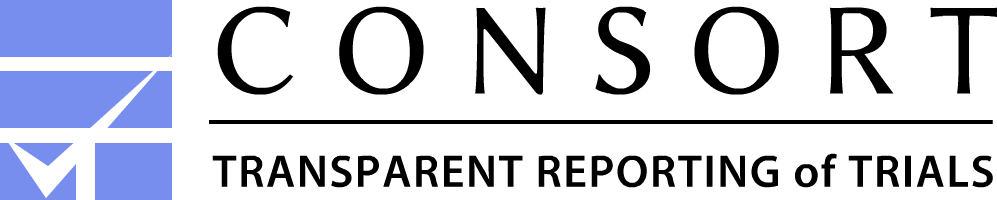


**CONSORT 2010 Flow Diagram**

Excluded (n= 67)

 Critical care need in ED: BP control (n= 16)

 Critical care need in ED: other (n= 11)

 Endovascular Therapy (n= 4)

  Enrolled in another clinical trial (n= 2)

  Declined/unable to consent (n= 6)

  Other/unknown reasons (n= 28)

Assessed for eligibility (n= 102)

## Enrollment

## Analysis

Analysed (n= 35)
 Excluded from analysis (n= 0)

## Follow-Up

Lost to follow-up (n= 2)

 Unable to reach (n= 2)

Discontinued intervention (n= 0)

Allocated to intervention (n= 35)

 Received allocated intervention (n= 35)

 Did not receive allocated intervention (n= 0)

All patients enrolled in the intervention arm (n= 35)

## Allocation
